# Supplementary material
Source: publisher site journal article supplement (http://www.kjim.org/upload/media/kjim-2021-299-suppl5.pdf)
Supplement: Supplementary file 1 [file kjim-2021-299-suppl5.pdf]

**Supplementary Table 1. Nucleotide sequences of protein drugs**

| Nucleotide                  | Nucleotide sequences                                                                                                                                                                                                                                                                                                                                                                                                                                                                                                                                                                                                                                                                                                                                                                                                                                                                                                                                                                                                                                                                                                                                                                                                                                                                                                                                                                                                                                                                                                                                                                                                                                                                                                                                                                                                                                                                                                                                                                                                                                                                                                                                                                                                                                                                                                           |
|-----------------------------|--------------------------------------------------------------------------------------------------------------------------------------------------------------------------------------------------------------------------------------------------------------------------------------------------------------------------------------------------------------------------------------------------------------------------------------------------------------------------------------------------------------------------------------------------------------------------------------------------------------------------------------------------------------------------------------------------------------------------------------------------------------------------------------------------------------------------------------------------------------------------------------------------------------------------------------------------------------------------------------------------------------------------------------------------------------------------------------------------------------------------------------------------------------------------------------------------------------------------------------------------------------------------------------------------------------------------------------------------------------------------------------------------------------------------------------------------------------------------------------------------------------------------------------------------------------------------------------------------------------------------------------------------------------------------------------------------------------------------------------------------------------------------------------------------------------------------------------------------------------------------------------------------------------------------------------------------------------------------------------------------------------------------------------------------------------------------------------------------------------------------------------------------------------------------------------------------------------------------------------------------------------------------------------------------------------------------------|
| Anti-CD25HC/IL-10/<br>CXCR3 | CATGGCAACCATGGGTTGGAGTTACATAATACTGTTTTTGGTGGCGACCGCAGCGGACGTCCATTCCCAATTG-<br>CAACAGTCCGGCACAGTTCTGGCCAGGCCTGGAGCCAGTGTGAAAATGTCCTGTAAAGCCAGCGGTTACT-<br>CATTACACGATACTGGATGCACTGGATTAAGCAACGGCCCGGTCAAGGCTTGGAGTGGATCGGGGC-<br>GATTTACCCCGGTAACCTCAGACACGTCATATAACCAAAAAGTTTGAAGGTAAGGCTAAGCTGACTGCTGTCA-<br>CATCAGCAAGTACTGCATATATGGAGCTGAGTAGTTTGACCCACGAAGACTCAGCAGTATACTACTGCTC-<br>CCGAGATTATGGCTACTATTTTACTTCTGGGGTCAGGGGACGACGCTCACGGTTAGCTCTGCAAGTAC-<br>CAAAGGTCCAAGTGTCTTCTCTCGCCCCCTCCAGTAAGAGTACTAGTGGCGGAAGTGCAGGCTCTCGGTTG-<br>CCTCGTAAAGGACTACTTCCCGGAACCGGTCACGGTCTCATGGAACCTGCGGGCGTTGACCTCCGGCGTTCA-<br>CACCTTCCGGCCGACTGCAATCTAGTGGACTTACTCTCTCAGTAGTGTGTCACGGTTCCCTCCAGCTCCCT-<br>GGGCACACAGACTTATATATGCAACGTAAACCATAAGCCATCAAATACTAAGGTCGATAAAAAGAGTGGAG-<br>CCCCCAAAAGTTGCGATAAGACTCACACTTGCCCGCCATGCCAGCGCCTGAGCTTTTGGGAGGTCCAT-<br>CAGTTTTTCTGTTCCGCCAAAACCGAAGGACACACTGATGATCAGCCGGACTCCTGAGGTTACATGTGTCGTC-<br>GTTGATGTGTCACGAAGATCCCGAAGTAAAGTTCAATTGGTATGTAGATGGCGTAGAGGTACATAATGCTA-<br>AACTAAACCGCGGGAAGAGCAATATAATTCCACATACAGAGTAGTTTCTGTGCTGACAGTACTTCATCAG-<br>GATTGGCTTAACGGCAAGGAGTATAAATGTAAAGTTTCAAATAAAGCGTTGCCGCGCCATCGAGAAGAC-<br>GATCAGCAAAGCGAAAGGACAGCCGAGAGAACCTCAAGTGTACTCTCCCTCCTTCTCGGGACGAGCT-<br>TACTAAAAACCAAGTCAGCCTCACCTGCCGTTAAAGGGTTTCTATCCTTCTGATATAGCAGTAGAGTGGGAAT-<br>CAAATGGACAACCAGAGAATAACTATAAGACCACCCCTCCAGTACTTGATTCAGACGGTTCCTTTTTTCTG-<br>TATAGCAAACCTACTGTAGACAAGAGTAGGTGGCAACAAGGGAACGTGTTCTCTTGTCTAGTATGATGAAG-<br>CACTTCATAACCTATACTCAAAGAGCCTTCTACTGAGCCAGTAAGGGAGGGGGAGGTAGCGGCGGAG-<br>GAGGGAGTGGGGGCGGGGGCTCTAGCAGGGGGCAATATCCAGGGAAGATAATAATGTACTCATTTCCTCGT-<br>AGGCAATCCCATATGCTGCTGGAGCTTGAACCGCCTTAGTCAAGTGTGAAAACCTTTCTTCAAACAAAAGAC-<br>CAGTTGGACAACATTTTGTACCGACAGTCTTATGCAAGATTTCAAGGGATATCTTGGATGCCAAGCACT-<br>TAGTGAGATGATACAGTTTTACTTGGTTGAGGTAATGCCACAAGCTGAGAAGCACGGCCAGAAATCAAG-<br>GAGCACCTCAACAGCTTGGGGGAAAAACTTAAACACTGCGGATGCGACTGCGGAGGTGCCATCGCTTCCCTC-<br>CCTGCGAAAACAAGTCTAAAGCCGTTGAGCAGGTGAAATCCGACTTAAATAAGCTCCAGGACCAGGGAG-<br>TATACAAGGCAATGAATGAATTCGACATCTTTATAAACTGCATTGAAGCATATATGATGATCAAGATGAAAAGT-<br>GGAGGAGGAGGGTCTGGCGGAGGAGGGTCAATGGTTCTCGAAGTCTTGACCATCAGGTCCTTAATGATGCA-<br>GAGGTGCGAGCCCTTTGGAGAAGTTTCTAGCTCTTATGATTATGGTGAATAAGTCAAGTCAAGTCTTGTGCA-<br>CAAGCCACCTTGCCCCAAGATTTACAGCTTGAACCTCGACAGGGGATCC |
| Anti-CD25LC                 | GCTAGCATGGCCACCATGGGATGGAGCTATATCCTCTTTTTGGTGGCCACAGCGGCCGATGTCCACTCG-<br>CAGATTGTGTCTACACAGAGCCCCGCCATCATGAGCGCCTCTCCAGGCGAGAAAGTGACCATGACATGTAGCG-<br>CCAGCAGCAGCAGATCCTACATGCAGTGGTATCAGCAGAAGCCCGGCACAAGCCCCAAGAGATGGATCTAC-<br>GATACCAGCAAGCTGGCCTCTGGCGTGCCAGCCAGATTTTCTGGCTCTGGCAGCGGCACCAGCTACAGCCT-<br>GACAATCTCTAGCATGGAAGCCGAGGACGCCGCCACCTACTACTGTACCAGAGAAGCAGCTACACCTTCG-<br>GCGGAGGCACCAAGCTGGAAATCAAGAGAACAGTGGCCGCTCCGAGCGTGTTCATCTTTCCACCAAGCGAC-<br>GAGCAGCTGAAGTCTGGCACAGCCTGTGCTGTGCTGCTGAACAACCTTACCCTCGGGAAGCCAAGGTG-<br>CAGTGAAGGTGGACAATGCCCTGCAGAGCGGCAATAGCCAAGAGAGCGTGACCGAGCAGGACAGCAAG-<br>GACTCTACCTACTCTGAGCAGCACCTGACACTGAGCAAGGCCGACTACGAGAAGCACAAGGTGTACG-<br>CCTGTGAAGTGACACACCAGGGCCTGAGCAGCCCTGTGACCAAGAGCTTCAATAGAGGCGAGGGATCC                                                                                                                                                                                                                                                                                                                                                                                                                                                                                                                                                                                                                                                                                                                                                                                                                                                                                                                                                                                                                                                                                                                                                                                                                                                                                                                                                                                                                                                                                                                                                          |

HC, heavy chain; IL-10, interleukin-10; CXCR3, C-X-C motif chemokine receptor 3; LC, light chain.
